# Supplementary material for: A SO3H-group anchored covalent organic framework for the synthesis of hydroxy carbamates in a single step utilizing CO2
Source: Royal Society of Chemistry journal article supplement (doi:10.1039/d2nj05934g), 2023-01-01
Supplement: d2nj05934g1.pdf [file d2nj05934g1.pdf]

## SUPPORTING INFORMATION

### **SO<sub>3</sub>H-group anchored Covalent Organic Frame work for the synthesis of hydroxyl-carbamate in a single step utilizing CO<sub>2</sub>**

Titu Mondal,<sup>a</sup> Jhumur Seth,<sup>a</sup> Somnath Sarkar<sup>a</sup> and Sk Manirul Islam\*<sup>a</sup>

<sup>a</sup>Department of Chemistry, University of Kalyani, Kalyani, Nadia 741235, West Bengal, India

| <b>Serial Number</b> | <b>Content</b>                                                                                        | <b>Pages</b> |
|----------------------|-------------------------------------------------------------------------------------------------------|--------------|
| 1.                   | Materials and reagent                                                                                 | 2            |
| 2.                   | Instruments specification                                                                             | 2            |
| 3.                   | Synthesis of TpPa-SO <sub>3</sub> H                                                                   | 2            |
| 4.                   | Synthesis procedure of hydroxyl-carbamates                                                            | 2            |
| 5.                   | FTIR Spectrum of reused catalyst                                                                      | 3            |
| 6.                   | <sup>1</sup> H NMR and <sup>13</sup> C NMR data of 2-hydroxy-3-isopropoxypropyl phenylcarbamate       | 4-5          |
| 7.                   | <sup>1</sup> H NMR data and spectra of 2-hydroxypropyl phenylcarbamate                                | 6            |
| 8.                   | <sup>1</sup> H NMR data and <sup>13</sup> C NMR data of 2-hydroxycycloheptyl phenylcarbamate          | 7-8          |
| 9.                   | <sup>1</sup> H NMR data and <sup>13</sup> C NMR data of 2-hydroxy-3-isopropoxypropyl benzylcarbamate  | 9-10         |
| 10.                  | <sup>1</sup> H NMR data and spectra of 3-chloro-2-hydroxypropyl benzylcarbamate                       | 11           |
| 11.                  | <sup>1</sup> H NMR data and spectra of 2-hydroxypropyl benzylcarbamate                                | 12           |
| 12.                  | <sup>1</sup> H NMR data and <sup>13</sup> C NMR data of 2-hydroxy-3-isopropoxypropyl diethylcarbamate | 13-14        |
| 13.                  | <sup>1</sup> H NMR data and <sup>13</sup> C NMR data of 2-hydroxy-3-isopropoxypropyl dibutylcarbamate | 15-16        |
| 14.                  | Reference                                                                                             | 16           |

## **Materials**

All chemicals were purchased from commercially available sources and used as received without further purification. Solvents were distilled and dried through standard methods before use.

## **Characterization Techniques**

Fourier-transform infrared spectroscopy was carried out on a Perkin-Elmer FTIR 783 spectrophotometer using KBr pellets. Bruker D8 Advance X-ray diffractometer using Cu-K $\alpha$  radiation ( $\lambda = 1.5418 \text{ \AA}$ ) operating at 40 kV and 40 mA was utilized to record powder X-ray diffraction (PXRD) data of samples. Bruker AMX- 400 instrument was operated for  $^1\text{H}$  NMR spectra. Transmission Electron Microscope (TEM) [JEOL JEM 2100] was used to obtain the morphological information of the sample. The N $_2$  adsorption-desorption analysis of catalyst sample was conducted by using a BET Surface Analyzer [QUANTACHROME ASIQC602-5]. X-ray photoelectron spectroscopy was executed by using an Omicron Nanotechnology GmbH XPS machine.

## **Experimental Section:**

### Synthesis of TpPa-SO $_3$ H:

The TpPa-SO $_3$ H COF was synthesized by condensation reaction, under solvothermal condition, between 1,3,5-triformylphloroglucinol (Tp) and 2,5-diaminobenzenesulfonic acid (Pa-SO $_3$ H). A 3 mL mixture of solution was made by 1,4-dioxane and mesitylene were taken in 1:4 ratio in a round bottom flask, followed by the addition of 1,3,5-triformylphloroglucinol (Tp) (0.3 mmol, 63 mg) and 2,5-diaminobenzenesulfonic acid (Pa-SO $_3$ H) (0.45 mmol, 84.6 mg). After degassing the whole mixture for 30 min, it was stirred at 120 °C for 3 days in an inert atmosphere (using N $_2$  gas atmosphere). A red coloured solid was obtained which was collected by filtration and washed with ethanol and tetrahydrofuran for three times, respectively. The obtained red crystallite product was dried at 100 °C for another 24 h to get the as mentioned TpPa-SO $_3$ H (66.7 mg). The amount of yield obtained is 82%.

### General Procedure of catalytic synthesis of hydroxyl-carbamate:

In this reaction, epoxide and amine have been taken in a fixed ratio into a round bottom flask. Then, 30 mg of TpPa-SO $_3$ H has been taken as a catalyst and 10 mL chloroform as solvent. The whole mixture has been degassed. Now, the reaction mixture has been refluxed under nitrogen atmosphere at 80 °C for 8 h.

After completion of the reaction, it has been extracted with ethyl acetate and washed for several times. Finally, a N.M.R. spectrum has been done with the obtained product to confirm its structure.

**FTIR Spectrum of reused catalyst:**

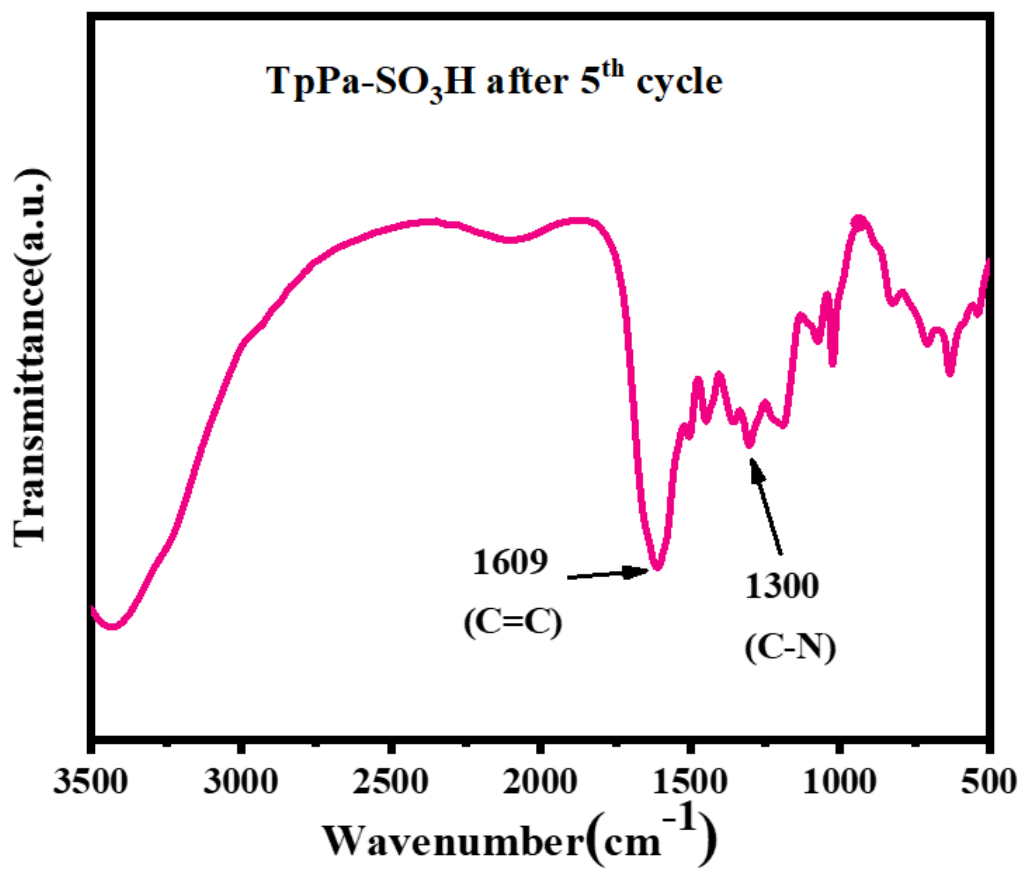

**Figure S1.** FTIR Spectrum of reused catalyst.

*NMR data of N-methylated products*

2-hydroxy-3-isopropoxypropyl phenylcarbamate:

(Hydroxyl carbamate formed from Table 5, entry 1)

<sup>1</sup>H-NMR data:

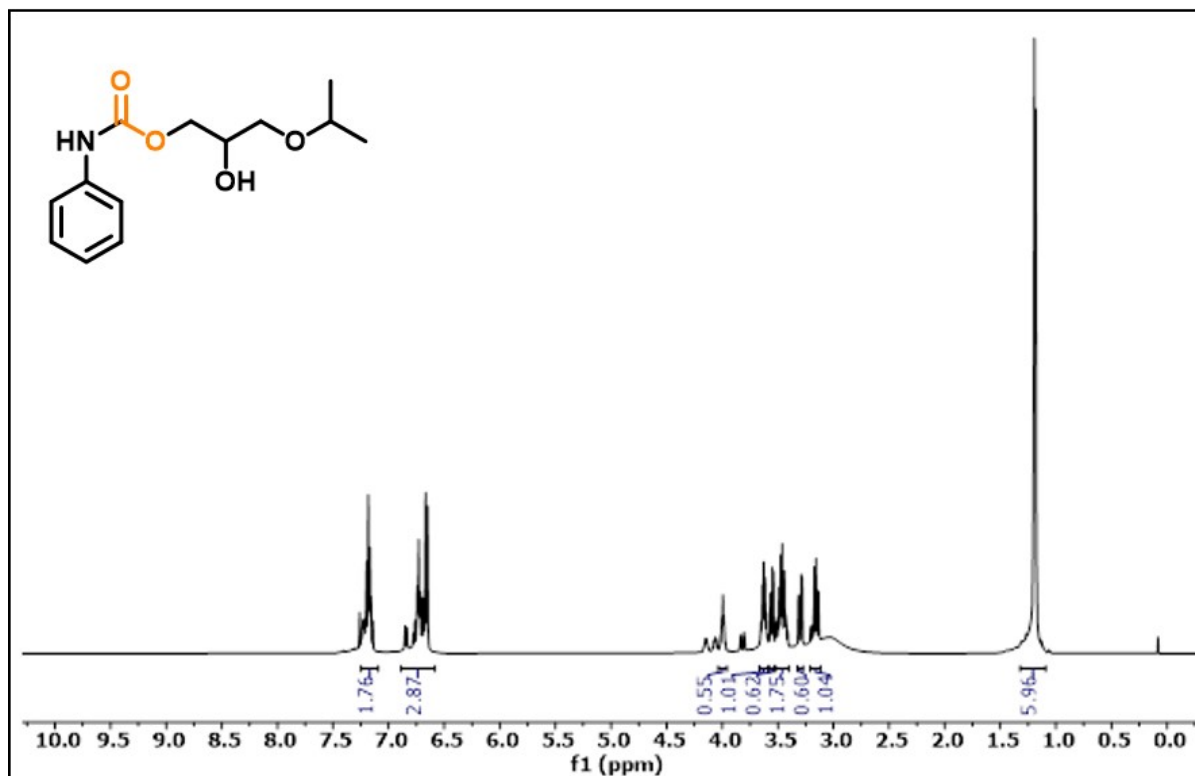

**Figure S2.** <sup>1</sup>H-NMR data of 2-hydroxy-3-isopropoxypropyl phenylcarbamate.

<sup>1</sup>H NMR (400 MHz, CDCl<sub>3</sub>): δ 7.25 – 7.09 (m, 2H), 6.89 – 6.58 (m, 3H), 4.02 – 3.97 (m, 1H), 3.67 – 3.59 (m, 1H), 3.55 (dd, *J* = 9.4, 3.9 Hz, 1H), 3.47 (dt, *J* = 9.5, 6.9 Hz, 2H), 3.30 (dd, *J* = 12.6, 4.3 Hz, 1H), 3.15 (dd, *J* = 12.8, 7.1 Hz, 1H), 1.19 (dt, *J* = 6.0, 1.8 Hz, 6H).

(Hydroxyl carbamate formed from Table 5, entry 1)

$^{13}\text{C}$  NMR spectra:

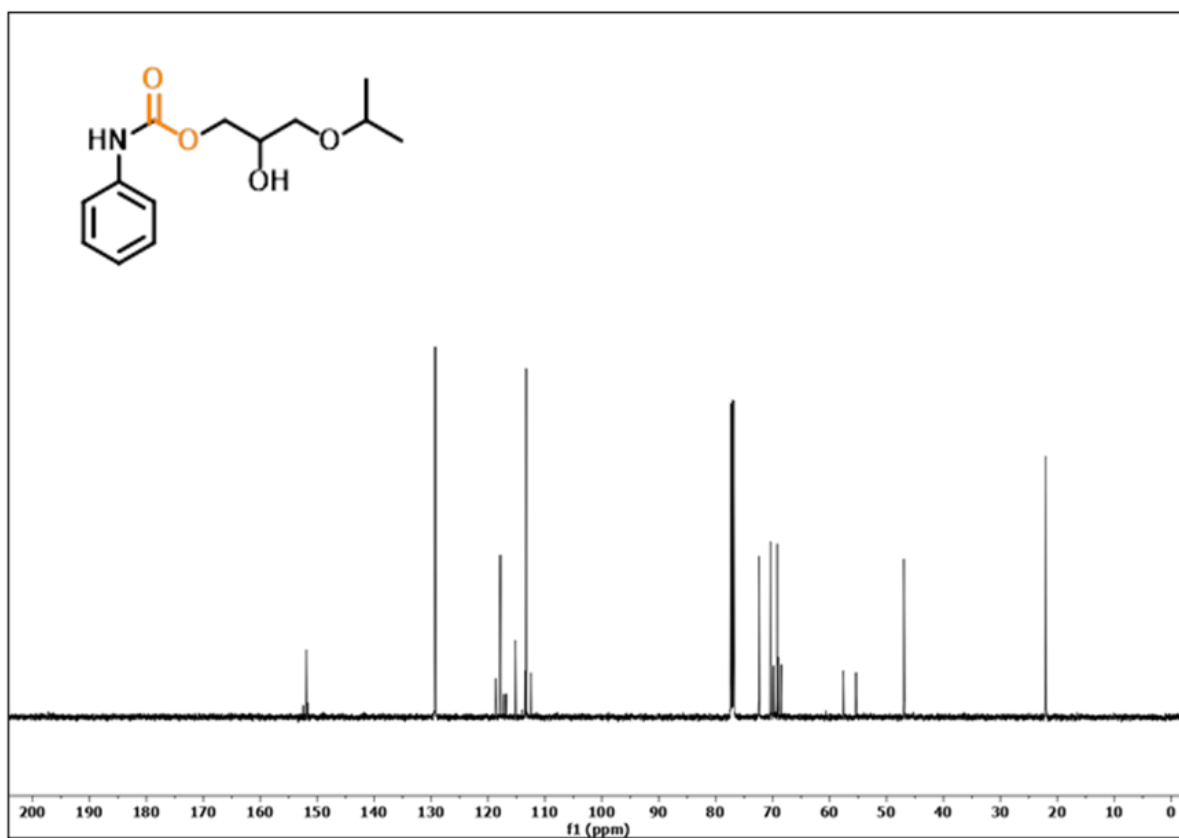

**Figure S3.**  $^{13}\text{C}$ -NMR data of 2-hydroxy-3-isopropoxypropyl phenylcarbamate.

$^{13}\text{C}$  NMR (100 MHz,  $\text{CDCl}_3$ ):  $\delta$  152.25, 129.27, 117.83, 115.20, 113.30, 72.39, 70.36, 69.19, 57.61, 55.35, 46.95, 22.07.

**2-hydroxypropyl phenylcarbamate<sup>1</sup>:**

(Hydroxyl carbamate formed from Table 5, entry 2)

<sup>1</sup>H-NMR data:

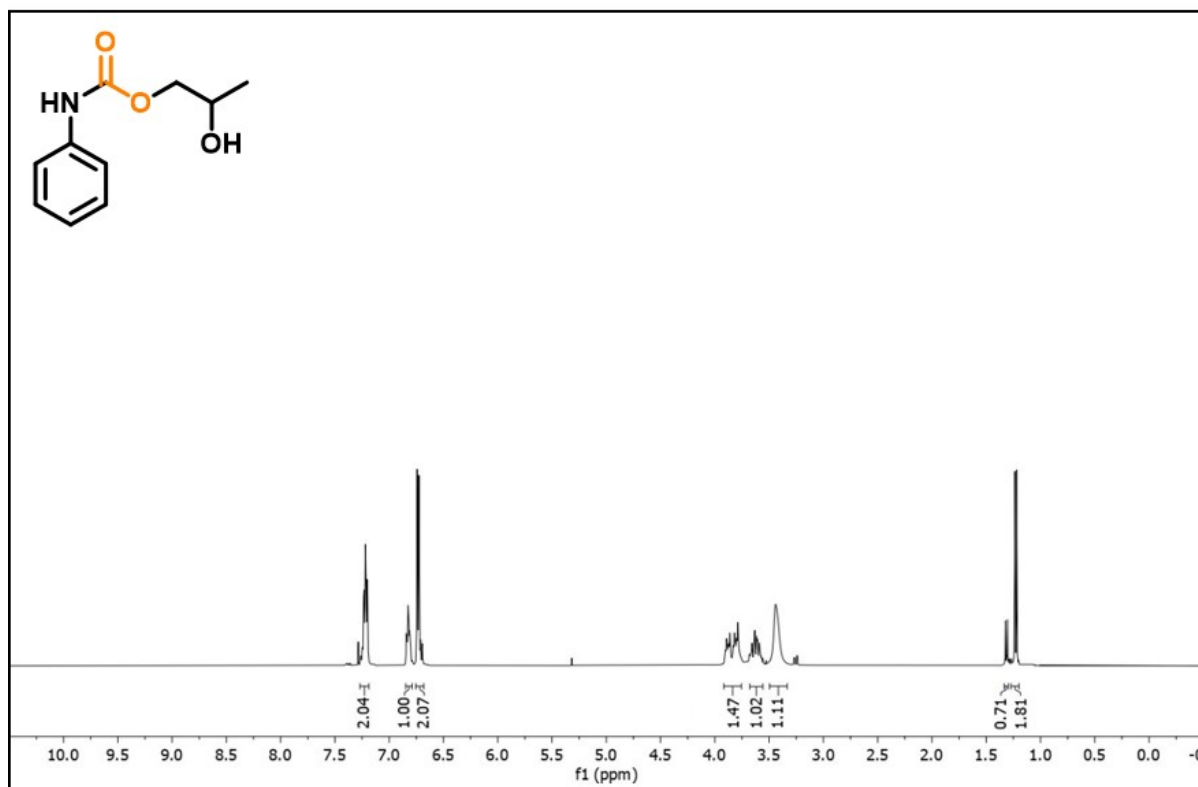

**Figure S4.** <sup>1</sup>H-NMR data of 2-hydroxypropyl phenylcarbamate.

<sup>1</sup>H NMR (400 MHz, CDCl<sub>3</sub>): δ 7.27 – 7.19 (m, 2H), 6.82 (m, *J* = 7.0, 1H), 6.76 – 6.68 (m, 2H), 3.91–3.75 (m, 2H), 3.70–3.55 (m, 1H), 3.40 (brs, 1H), 1.31 – 1.20 (d, 3H).

**2-hydroxycycloheptyl phenylcarbamate:**

(Hydroxyl carbamate formed from Table 5, entry 3)

**<sup>1</sup>H-NMR data:**

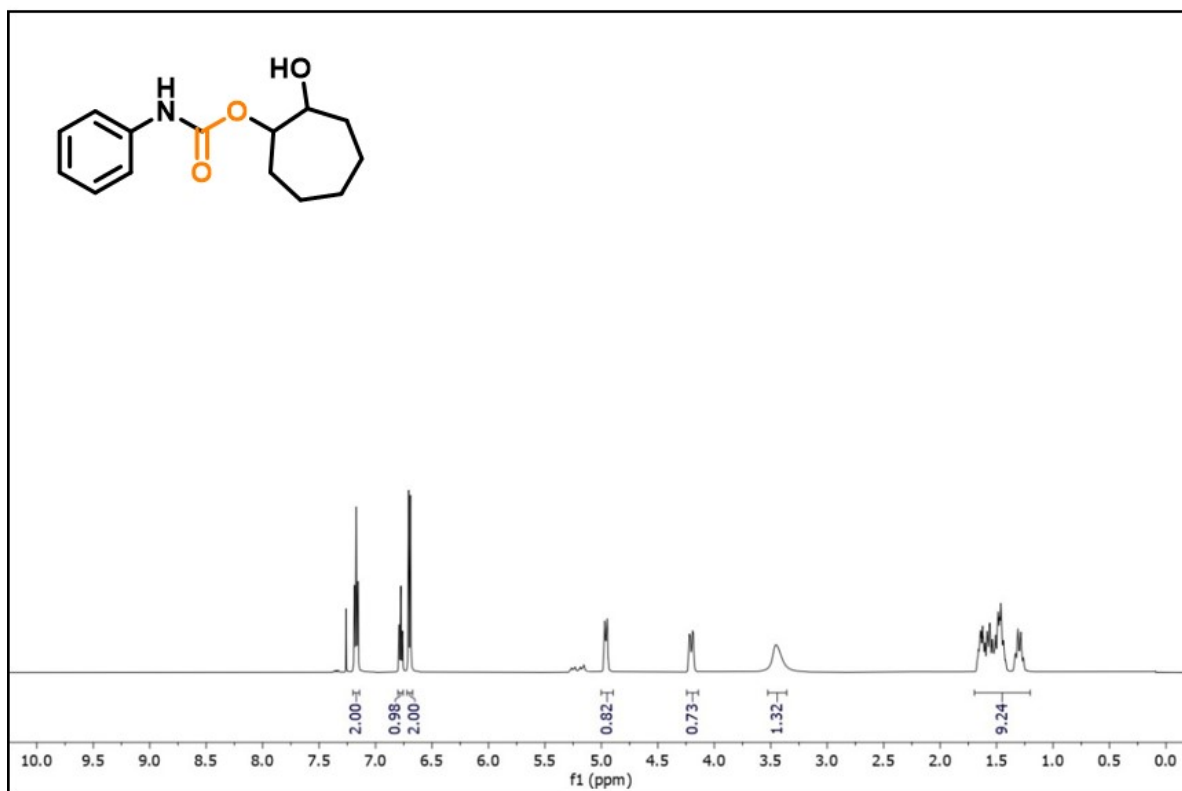

**Figure S5.** <sup>1</sup>H-NMR data of 2-hydroxycycloheptyl phenylcarbamate.

**<sup>1</sup>H NMR (400 MHz, CDCl<sub>3</sub>):**  $\delta$  7.17 (ddt,  $J = 8.6, 6.7, 1.4$  Hz, 2H), 6.78 (td,  $J = 7.3, 1.2$  Hz, 1H), 6.72 – 6.67 (m, 2H), 4.98-4.94 (d, 1H), 4.22-4.18 (m, 1H), 3.44 (s, 1H), 1.43 – 1.20 (m, 10H).

(Hydroxyl carbamate formed from Table 5, entry 3)

$^{13}\text{C}$  NMR spectra:

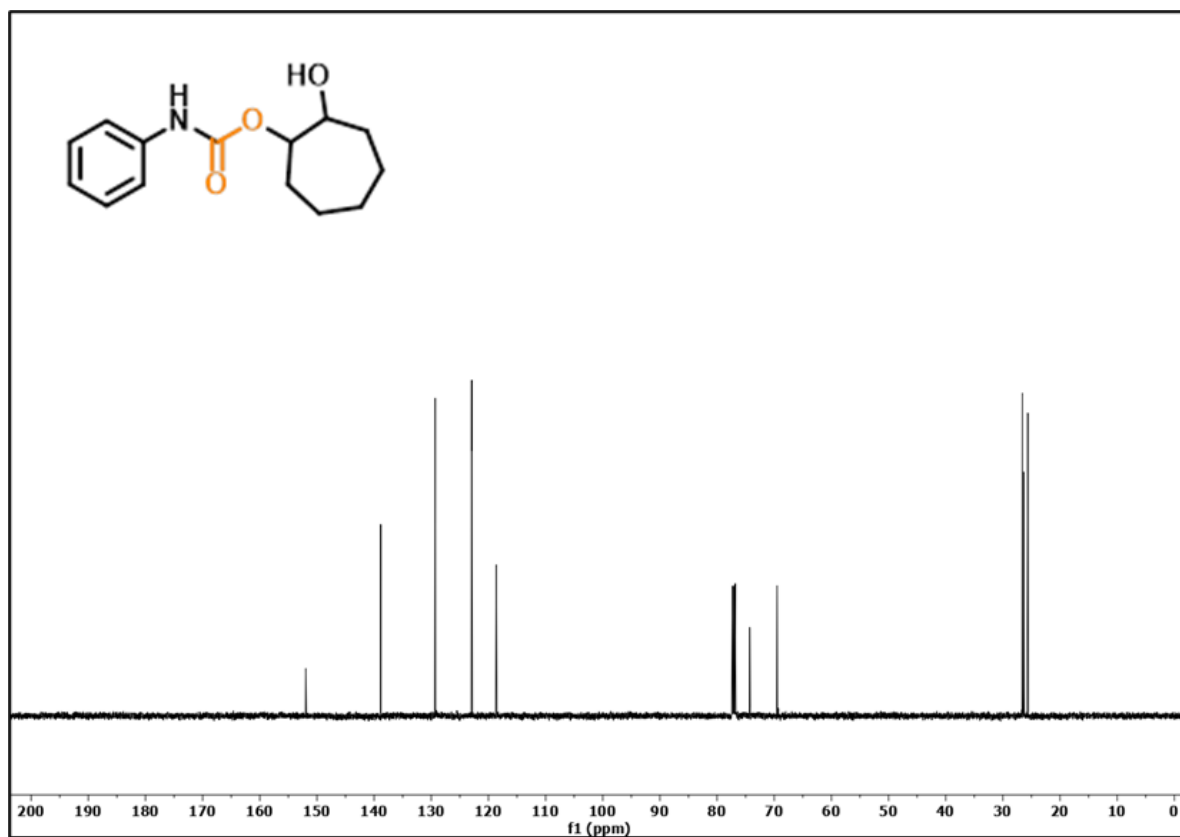

**Figure S6.**  $^{13}\text{C}$ -NMR data of 2-hydroxycycloheptyl phenylcarbamate.

$^{13}\text{C}$  NMR (100 MHz,  $\text{CDCl}_3$ ):  $\delta$  151.79, 139.35, 129.32, 123.11, 118.62, 72.35, 69.83, 26.59, 26.32, 25.62.



**2-hydroxy-3-isopropoxypropyl benzylcarbamate:**

(Hydroxyl carbamate formed from Table 5, entry 4)

<sup>1</sup>H-NMR data:

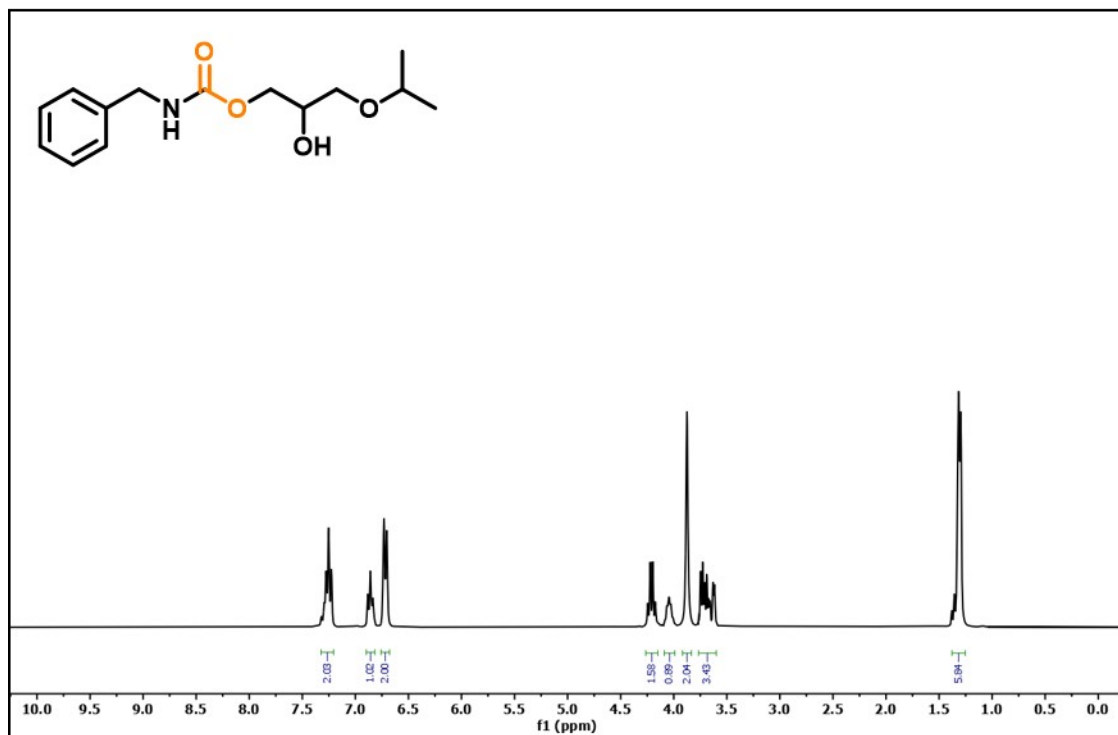

**Figure S7.** <sup>1</sup>H-NMR data of 2-hydroxy-3-isopropoxypropyl benzylcarbamate.

<sup>1</sup>H NMR (400 MHz, CDCl<sub>3</sub>): δ 7.25 (m, 2H), 6.85(m, 1H), 6.70(m, 2H), 4.20 (m, 2H), 4.05 (m, 1H), 3.83(s, 2H), 3.75-3.57(m, 3H) 1.40 – 1.25(m, 6H).

(Hydroxyl carbamate formed from Table 5, entry 4)

$^{13}\text{C}$  NMR spectra:

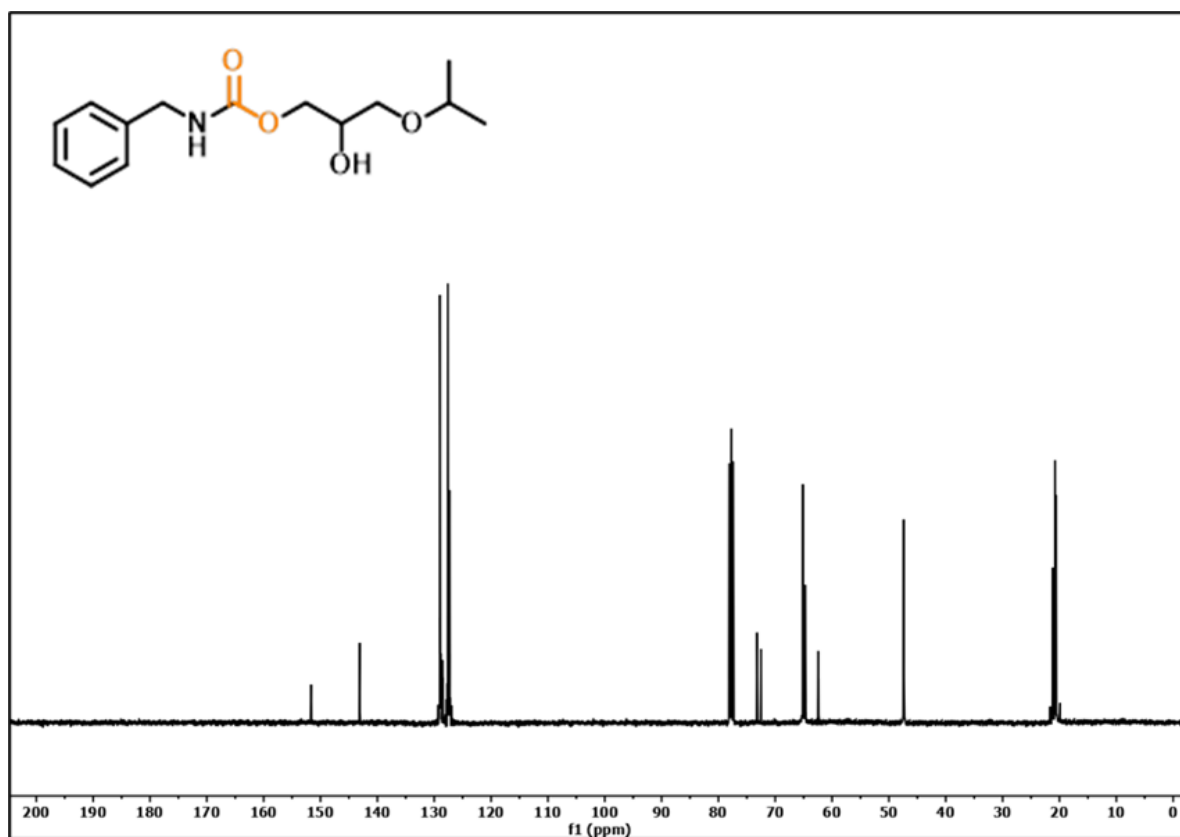

**Figure S8.**  $^{13}\text{C}$ -NMR data of 2-hydroxy-3-isopropoxypropyl benzylcarbamate.

$^{13}\text{C}$  NMR (100 MHz,  $\text{CDCl}_3$ ):  $\delta$  152.18, 143.11, 128.55, 127.12, 126.80, 73.20, 72.50, 65.12, 63.16, 47.12, 20.85.

**3-chloro-2-hydroxypropyl benzylcarbamate<sup>2</sup>:**

(Hydroxyl carbamate formed from Table 5, entry 5)

<sup>1</sup>H-NMR data:

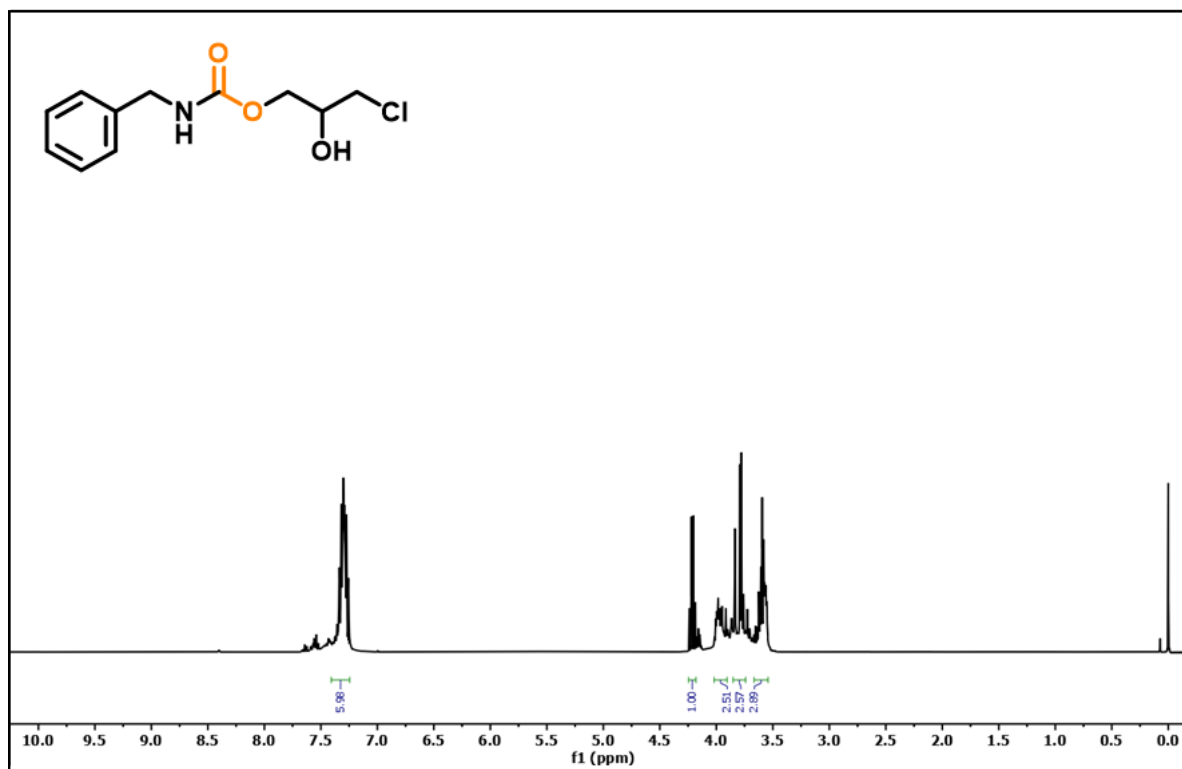

**Figure S9.** <sup>1</sup>H-NMR data of 3-chloro-2-hydroxypropyl benzylcarbamate.

<sup>1</sup>H NMR (400 MHz, CDCl<sub>3</sub>): δ 7.49 – 7.18 (m, 5H), 4.22 – 4.15 (m, 1H), 3.94 – 3.85 (m, 2H), 3.78 – 3.75 (m, 2H), 3.56 (m, 2H).

**2-hydroxypropyl benzylcarbamate<sup>2</sup>:**

(Hydroxyl carbamate formed from Table 5, entry 6)

<sup>1</sup>H-NMR data:

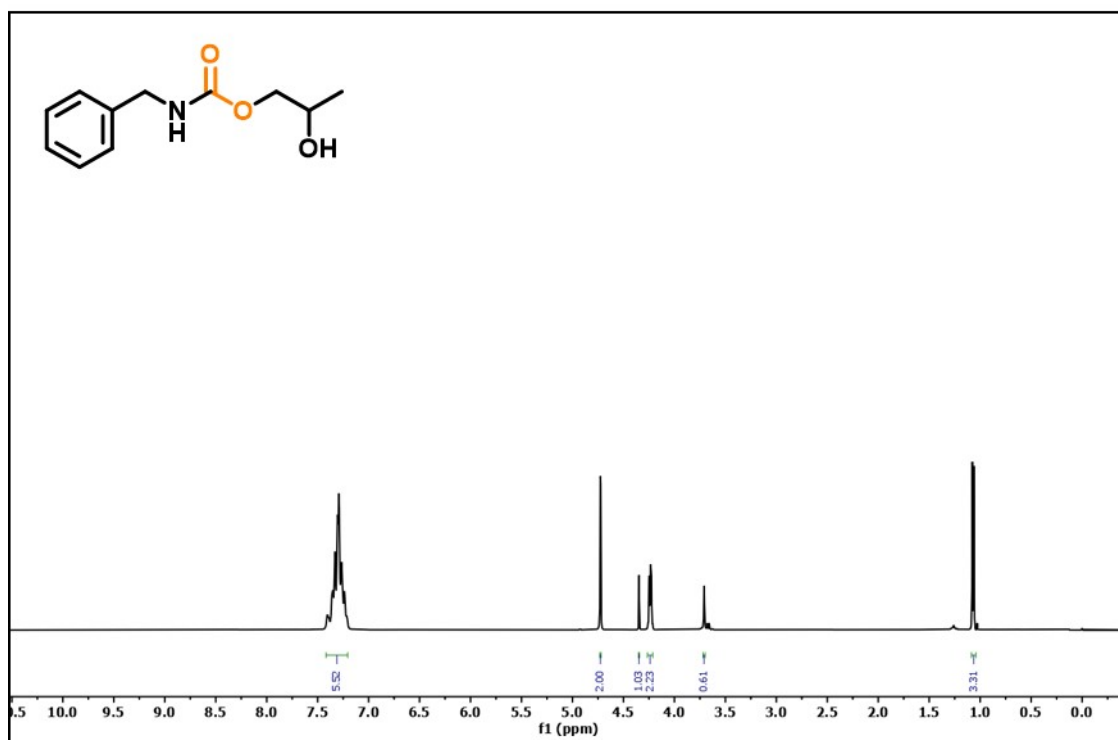

**Figure S10.** <sup>1</sup>H-NMR data of 2-hydroxypropyl benzylcarbamate.

<sup>1</sup>H NMR (400 MHz, CDCl<sub>3</sub>): 7.45 – 7.15 (m, 5H), 4.73 (d, *J* = 1.5 Hz, 2H), 4.32-4.29 (m, 1H), 4.27-4.22(m, 2H), 3.71 (s, 1H), 1.06 (d, *J* = 6.2 Hz, 3H).



(Hydroxyl carbamate formed from Table 5, entry 7)

<sup>13</sup>C NMR spectra:

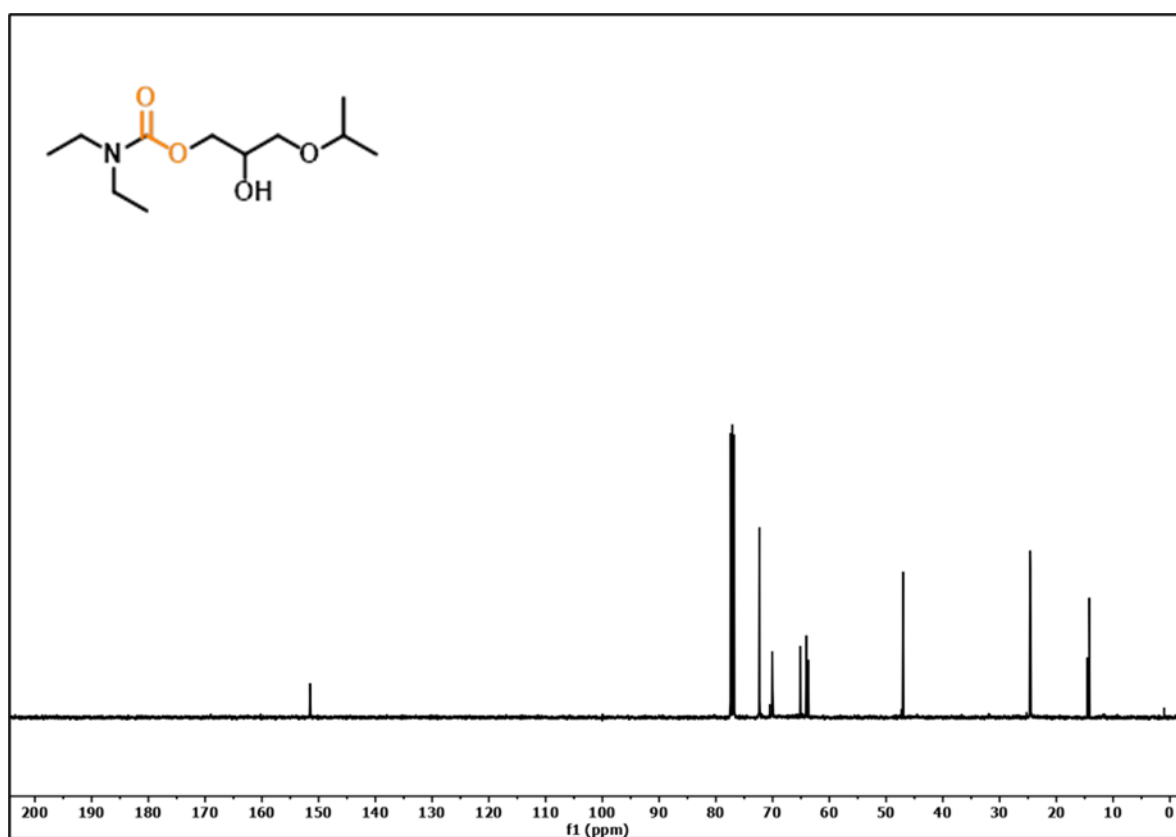

**Figure S12.** <sup>13</sup>C-NMR data of 2-hydroxy-3-isopropoxypropyl diethylcarbamate.

<sup>13</sup>C NMR (100 MHz, CDCl<sub>3</sub>): δ 151.81, 72.32, 70.04, 65.04, 63.88, 47.02, 24.62, 14.11.

**2-hydroxy-3-isopropoxypropyl dibutylcarbamate:**

(Hydroxyl carbamate formed from Table 5, entry 8)

**<sup>1</sup>H-NMR data:**

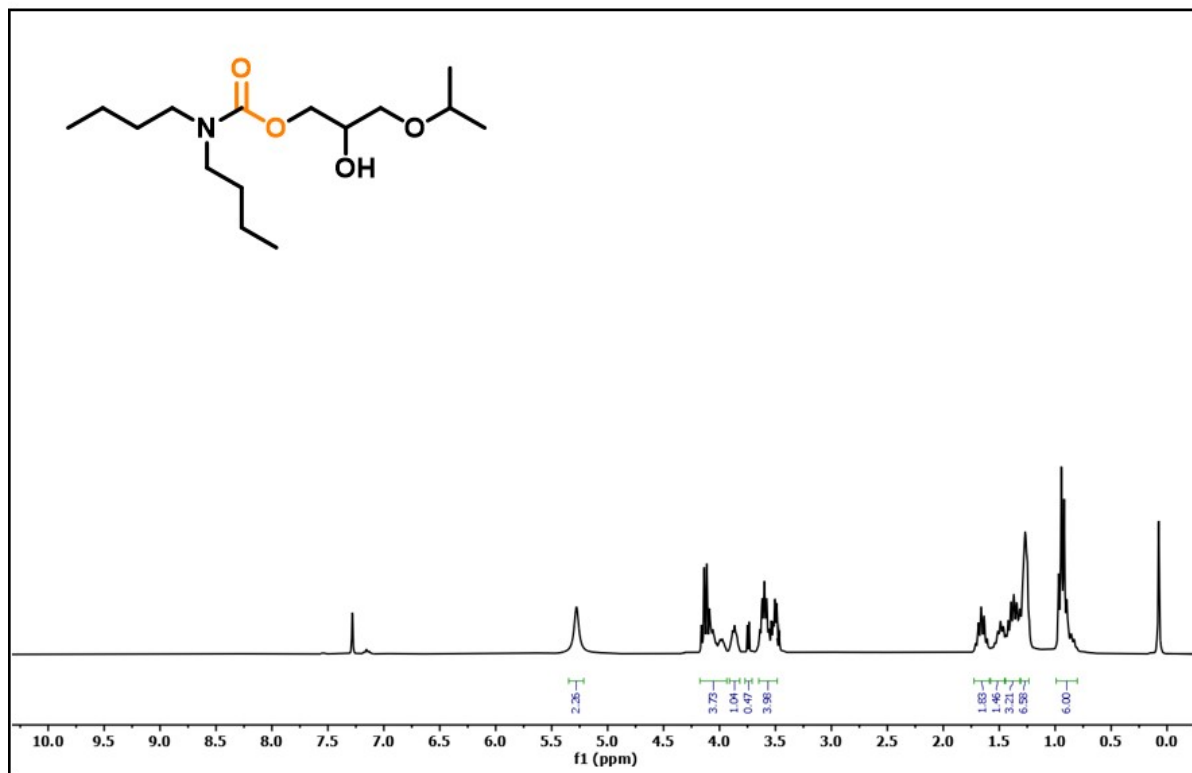

**Figure S13.** <sup>1</sup>H-NMR data of 2-hydroxy-3-isopropoxypropyl dibutylcarbamate.

**<sup>1</sup>H NMR (400 MHz, CDCl<sub>3</sub>):** δ 5.26 (s, 1H), 4.15 – 3.91 (m, 4H), 3.85 (m, 1H), 3.75 (m, 1H), 3.60 – 3.47 (m, 4H), 1.70 – 1.40 (m, 4H), 1.42 – 1.24 (m, 10H), 1.00 – 0.80 (m, 6H).

(Hydroxyl carbamate formed from Table 5, entry 8)

$^{13}\text{C}$  NMR spectra:

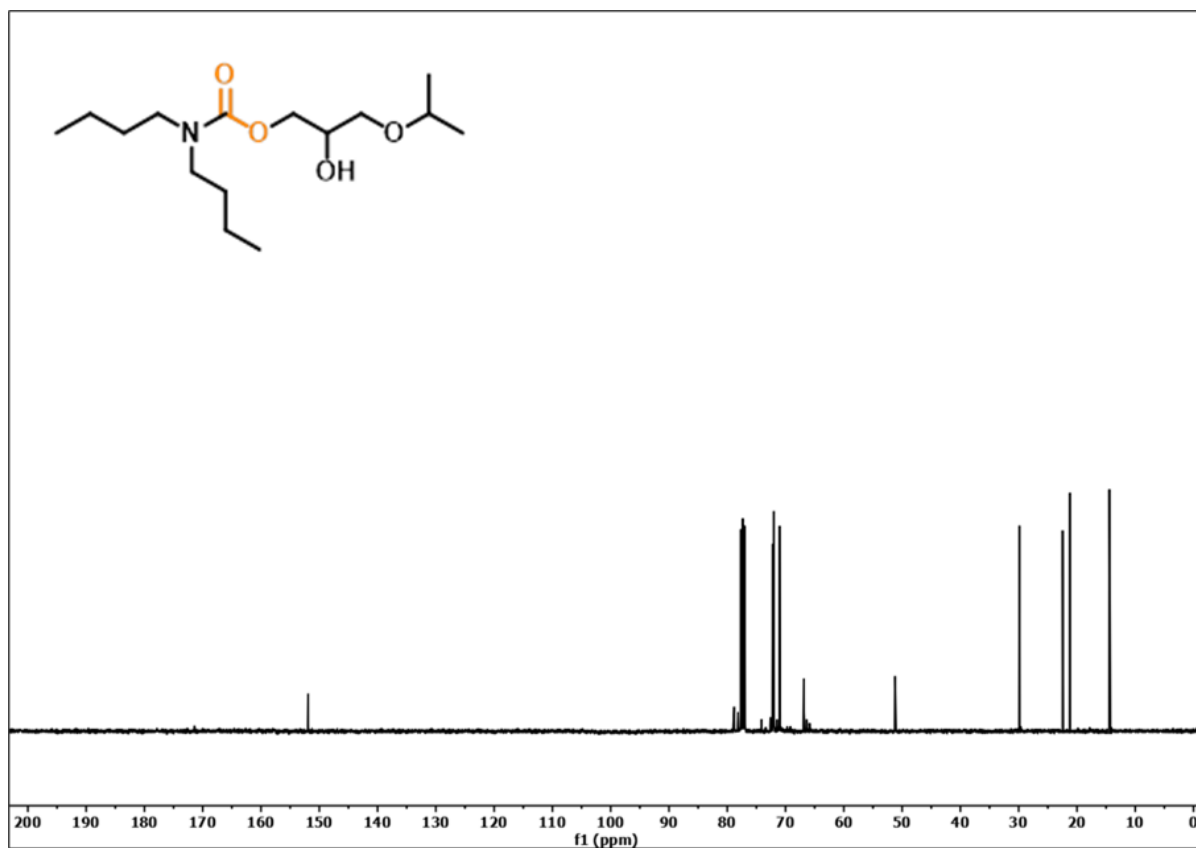

**Figure S14.**  $^{13}\text{C}$ -NMR data of 2-hydroxy-3-isopropoxypropyl dibutylcarbamate.

$^{13}\text{C}$  NMR (100 MHz,  $\text{CDCl}_3$ ):  $\delta$  152.47, 72.09, 71.02, 70.41, 66.85, 51.22, 29.92, 22.76, 21.18, 14.35.

#### Reference:

- (S1) Guo, W.; González-Fabra, J.; Bandeira, N. A.; Bo, C.; Kleij, A. W. A metal-free synthesis of N-aryl carbamates under ambient conditions. *Angewandte Chemie* **2015**, *127* (40), 11852.
- (S2) Shang, J.; Guo, X.; Li, Z.; Deng, Y.  $\text{CO}_2$  activation and fixation: highly efficient syntheses of hydroxy carbamates over  $\text{Au/Fe}_2\text{O}_3$ . *Green Chemistry* **2016**, *18* (10), 3082.
